# Supplementary material for: Observation of delayed fluorescence/room-temperature phosphorescence emissions in organic small-molecule emitters, their properties, and electroluminescent performance
Source: Royal Society of Chemistry journal article supplement (doi:10.1039/d5tc03720d), 2025-12-09

## Supporting information

### Observation of delayed fluorescence/room-temperature phosphorescence emissions in organic small-molecule emitters, their properties, and electroluminescent performance

Nuttapong Chantanop,<sup>a</sup> Phattananawee Nalaoh,<sup>a</sup> Wijitra Waengdongbung,<sup>a</sup> Rattanasiri Wannapakdee,<sup>a</sup> Patteera Funchien,<sup>a</sup> Suwapat Kongsabay,<sup>a</sup> Taweesak Sudyoosuk<sup>b</sup> and Vinich Promarak<sup>a\*</sup>

<sup>a</sup> Department of Materials Science and Engineering, School of Molecular Science and Engineering, Vidyasirimedhi Institute of Science and Technology, Wangchan, Rayong 21210, Thailand.

\*E-mail: [vinich.p@vistec.ac.th](mailto:vinich.p@vistec.ac.th).

<sup>b</sup> Frontier Research Center (FRC), Vidyasirimedhi Institute of Science and Technology, Wangchan, Rayong 21210, Thailand.

#### 1. Materials synthesis

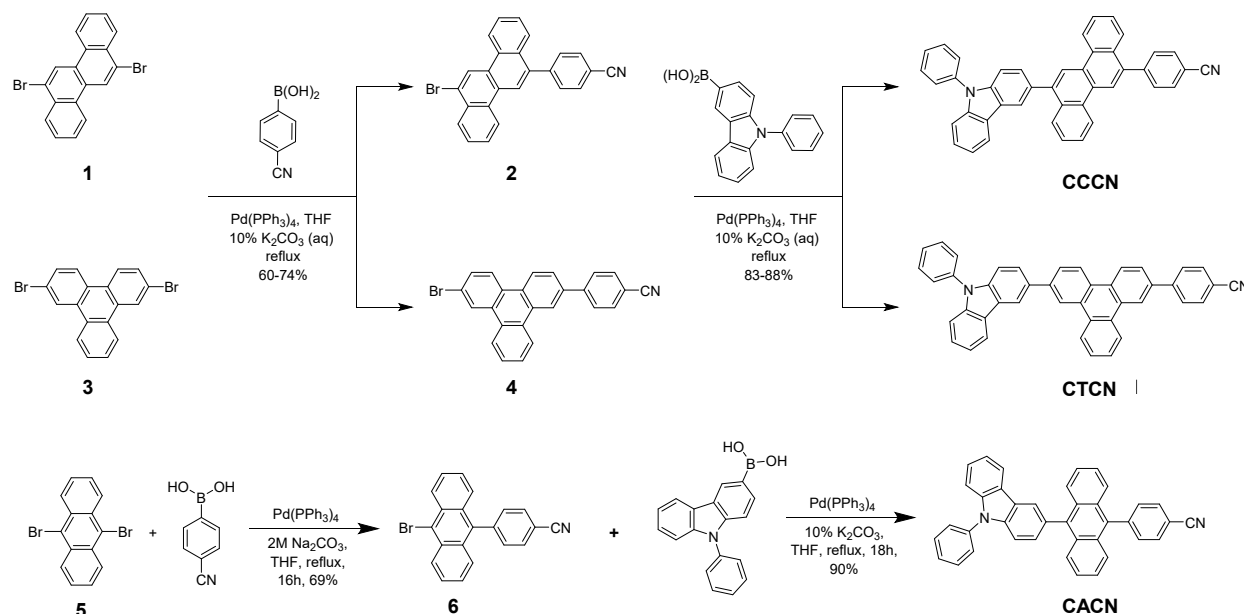

**Scheme S1** The synthesis of the designed molecules.

#### 4-(12-Bromochrysen-6-yl)benzonitrile (**2**)

A mixture of 6,12-dibromochrysene (700 mg, 1.80 mmol), 4-cyanophenylboronic acid (88 mg, 0.6 mmol), 10%  $\text{K}_2\text{CO}_3$  (aq) (10 mL), and  $\text{Pd(PPh}_3)_4$  (35 mg, 5 mol%) in dried THF (60 mL) was degassed with  $\text{N}_2$  for 10 min. The reaction mixture was stirred at reflux under  $\text{N}_2$  for 18 h. After being cooled to room temperature, the mixture was diluted with water (50 mL) and extracted with DCM (3 x 50 mL). The combined organic layer was washed with water (50 mL), brine (2 x 50 mL), dried over anhydrous  $\text{Na}_2\text{SO}_4$ , filtered, and concentrated in vacuo to dryness. The crude was purified by column chromatography on silica gel eluting with a gradient of dichloromethane/hexane mixture (0% to 50%) to obtain light yellow solids (147 mg, 60%). M.p. = 241–245 °C;  $^1\text{H}$  NMR (600 MHz,  $\text{CDCl}_3$ )  $\delta$  9.09 (1H, s, Ar-H), 8.80 (1H, d,  $J$  = 8.4 Hz, Ar-H), 8.78 – 8.73 (1H, m, Ar-H), 8.56 (1H, s, Ar-H), 8.50 – 8.45 (1H, m, Ar-H), 7.92 – 7.84 (m, 3H), 7.81 – 7.72 (m, 5H), 7.62 (1H, ddd,  $J$  = 8.1, 6.8, 1.2 Hz, Ar-H);  $^{13}\text{C}$  NMR (151 MHz,  $\text{CDCl}_3$ )  $\delta$  145.9, 137.8, 132.3, 131.4, 130.9, 130.8, 130.4, 130.0, 128.7, 128.3, 127.8, 127.8,

127.3, 127.2, 127.1, 126.2, 125.3, 123.6, 123.5, 123.3, 122.3, 118.8, 111.6; HRMS APCI/Q-TOF ( $m/z$ ): calcd 409.0289 for  $C_{25}H_{14}BrN$ ; found 409.9745 [ $M^+$ ].

#### 4-(7-Bromotriphenylen-2-yl)benzonitrile (4)

It was synthesized similarly to compound **2** using 2,7-dibromotriphenylene and obtained as white solids (270 mg, 74%). M.p. = 287–290 °C;  $^1H$  NMR (600 MHz,  $CDCl_3$ )  $\delta$  8.83 (1H, s, Ar-H), 8.79 (1H, d,  $J$  = 1.9 Hz, Ar-H), 8.73 – 8.70 (1H, m, Ar-H), 8.68 (1H, d,  $J$  = 8.5 Hz, Ar-H), 8.62 – 8.57 (1H, m, Ar-H), 8.52 (1H, d,  $J$  = 8.7 Hz, Ar-H), 7.90 – 7.87 (3H, m, Ar-H), 7.82 (1H, d,  $J$  = 8.0 Hz, Ar-H), 7.78 (1H, dd,  $J$  = 8.6, 1.9 Hz, Ar-H), 7.76 – 7.69 (2H, m, Ar-H);  $^{13}C$  NMR (151 MHz,  $CDCl_3$ )  $\delta$  145.4, 138.1, 132.8, 131.8, 130.5, 129.8, 129.3, 129.0, 128.1, 128.0, 127.9, 126.4, 126.2, 125.2, 124.2, 123.6, 123.3, 122.2, 118.9, 111.3; HRMS APCI/Q-TOF ( $m/z$ ): calcd 409.0289 for  $C_{25}H_{14}BrN$ ; found 409.9523 [ $M^+$ ].

#### 4-(10-Bromoanthracen-9-yl)benzonitrile (6)

It was synthesized similarly to compound **2** using 9,10-dibromoanthracene and obtained as yellow solids (338 mg, 69%).  $^1H$  NMR (600 MHz,  $CDCl_3$ )  $\delta$  8.63 (d,  $J$  = 8.9 Hz, 2H), 7.92 – 7.88 (m, 2H), 7.63 – 7.60 (m, 2H), 7.57 – 7.52 (m, 2H), 7.49 (d,  $J$  = 8.8 Hz, 2H), 7.43 – 7.40 (m, 2H);  $^{13}C$  NMR (151 MHz,  $CDCl_3$ )  $\delta$  143.8, 135.1, 132.3, 132.1, 130.5, 130.2, 128.2, 127.1, 126.4, 126.3, 124.0, 118.7, 112.0. HRMS APCI/Q-TOF ( $m/z$ ): calcd for  $C_{25}H_{14}BrN$  357.0153; found: 358.0198 [ $M + H$ ] $^+$ .

## 2. Single crystal XRD data

All crystallographic information (CIF) data, including CCDC numbers 1984569 and 2012094 for CCCN and CTCN, were deposited and obtained with no cost at <https://www.ccdc.cam.ac.uk/>.

**Table S1** Crystal structures information.

| Compound                     | CCCN               | CTCN               |
|------------------------------|--------------------|--------------------|
| CCDC Deposit Number          | 1984569            | 2012094            |
| Empirical formula            | $C_{43}H_{26}N_2$  | $C_{43}H_{26}N_2$  |
| Formula weight               | 570.66             | 570.66             |
| Temperature/K                | 110                | 195                |
| Crystal system               | monoclinic         | monoclinic         |
| Space group                  | $C2/c$             | $P21/n$            |
| a/Å                          | 17.234(2)          | 14.7177(4)         |
| b/Å                          | 9.2814(11)         | 8.9166(2)          |
| c/Å                          | 40.346(5)          | 22.1216(6)         |
| $\alpha/^\circ$              | 90                 | 90                 |
| $\beta/^\circ$               | 98.618(4)          | 99.1280(10)        |
| $\gamma/^\circ$              | 90                 | 90                 |
| Volume/Å <sup>3</sup>        | 6380.7(13)         | 2866.29(13)        |
| Z                            | 8                  | 4                  |
| $\rho_{calc}/cm^3$           | 1.188              | 1.322              |
| $\mu/mm^{-1}$                | 0.069              | 0.590              |
| F(000)                       | 2384.0             | 1192.0             |
| Crystal size/mm <sup>3</sup> | 0.38 × 0.30 × 0.08 | 0.58 × 0.12 × 0.05 |

| Radiation                                        | MoK $\alpha$ ( $\lambda$ = 0.71073)                                          | CuK $\alpha$ ( $\lambda$ = 1.54178)                                          |
|--------------------------------------------------|------------------------------------------------------------------------------|------------------------------------------------------------------------------|
| 2 $\Theta$ range for data collection/ $^{\circ}$ | 4.782 to 52.742                                                              | 6.75 to 140.138                                                              |
| Index ranges                                     | -21 $\leq$ h $\leq$ 21,<br>-11 $\leq$ k $\leq$ 11,<br>-50 $\leq$ l $\leq$ 50 | -17 $\leq$ h $\leq$ 14,<br>-10 $\leq$ k $\leq$ 10,<br>-26 $\leq$ l $\leq$ 26 |
| Reflections collected                            | 70682                                                                        | 43547                                                                        |
| Independent reflections                          | 6531 [ $R_{\text{int}}$ = 0.0711,<br>$R_{\text{sigma}}$ = 0.0339]            | 5421 [ $R_{\text{int}}$ = 0.0570,<br>$R_{\text{sigma}}$ = 0.0284]            |
| Data/restraints/parameters                       | 6531/0/406                                                                   | 5421/0/407                                                                   |
| Goodness-of-fit on $F^2$                         | 1.100                                                                        | 1.024                                                                        |
| Final R indexes [ $I \geq 2\sigma(I)$ ]          | $R_1$ = 0.0563, $wR_2$ = 0.1296                                              | $R_1$ = 0.0424, $wR_2$ = 0.1068                                              |
| Final R indexes [all data]                       | $R_1$ = 0.0716, $wR_2$ = 0.1363                                              | $R_1$ = 0.0542, $wR_2$ = 0.1141                                              |

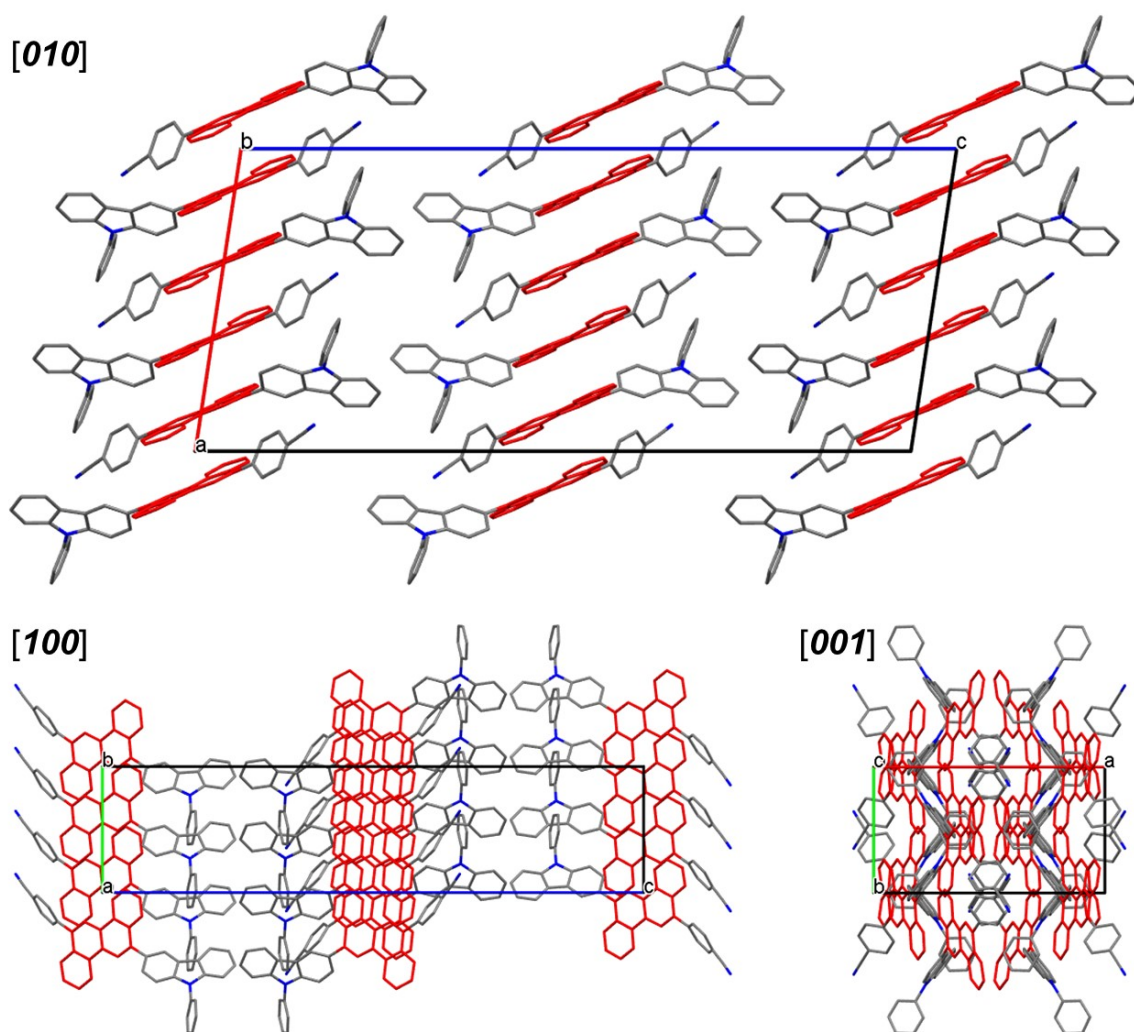

**Fi**

**g. S1.** Crystal packing of CCCN along [100], [010], and [001] directions with red-highlighted chrysene structure. All hydrogen atoms were omitted for clarity.

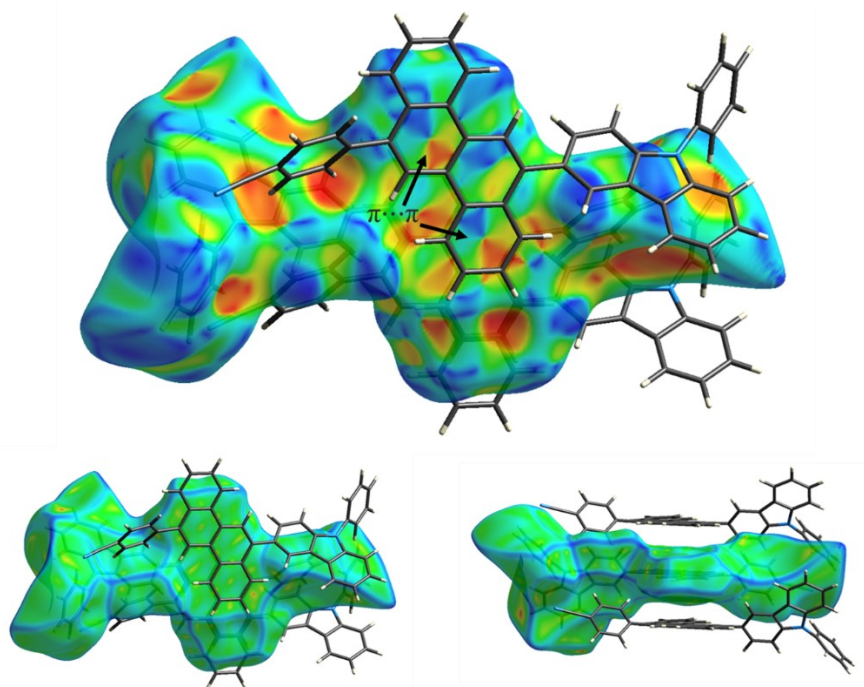

**Fig. S2** Hirshfeld Surface Analysis of **3CzCsCN** displayed shape index (top) and curvedness (bottom-left: the top view, bottom-right: the side view). The blue and red triangles on the shape index surface indicated  $\pi$ - $\pi$  interaction in the 6-membered-ring subunits of chrysene (highlighted with the arrow line). A flat green surface of curvedness indicated the intermolecular  $\pi$ - $\pi$  interaction, while the blue-line edge crossed over the subunit of the chrysene moiety that presented no interplane  $\pi$ -stacking.

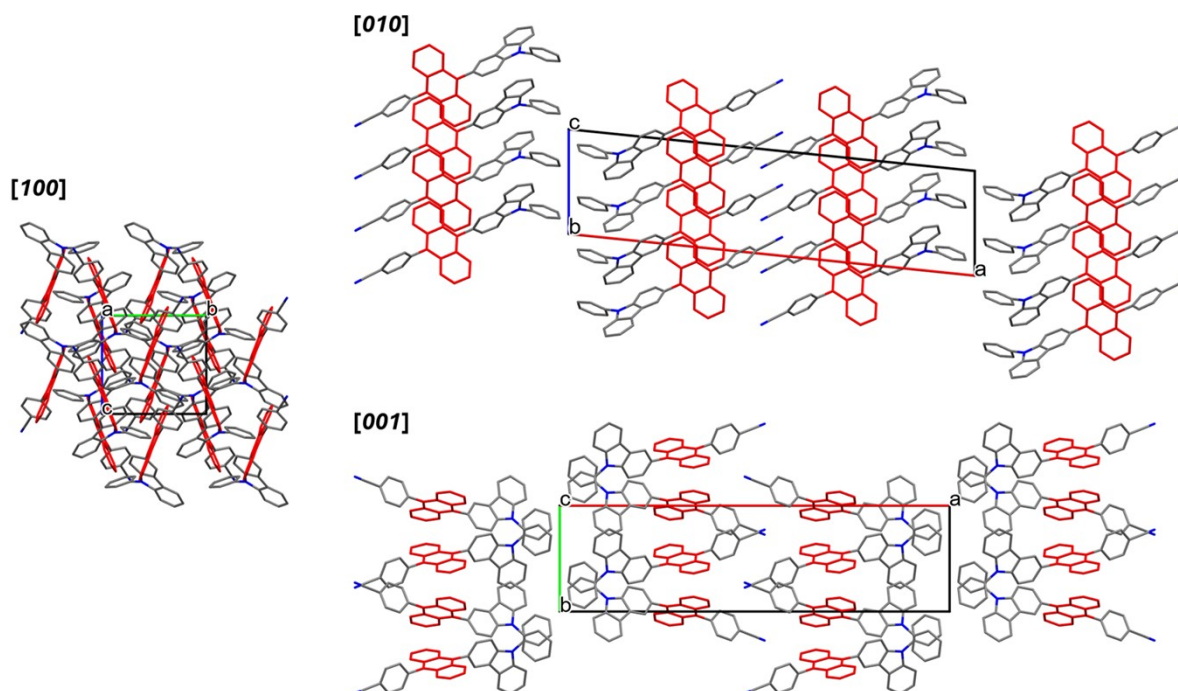

**Fig. S3** Crystal packing of **CzAnthBN** from reference<sup>1</sup> along  $[100]$ ,  $[010]$ , and  $[001]$  directions with red-highlighted anthracene structure. All hydrogen atoms were omitted for clarity.

<sup>1</sup>Journal of Materials Chemistry C, 2019, 7, 1014, DOI: 10.1039/C8TC05707A

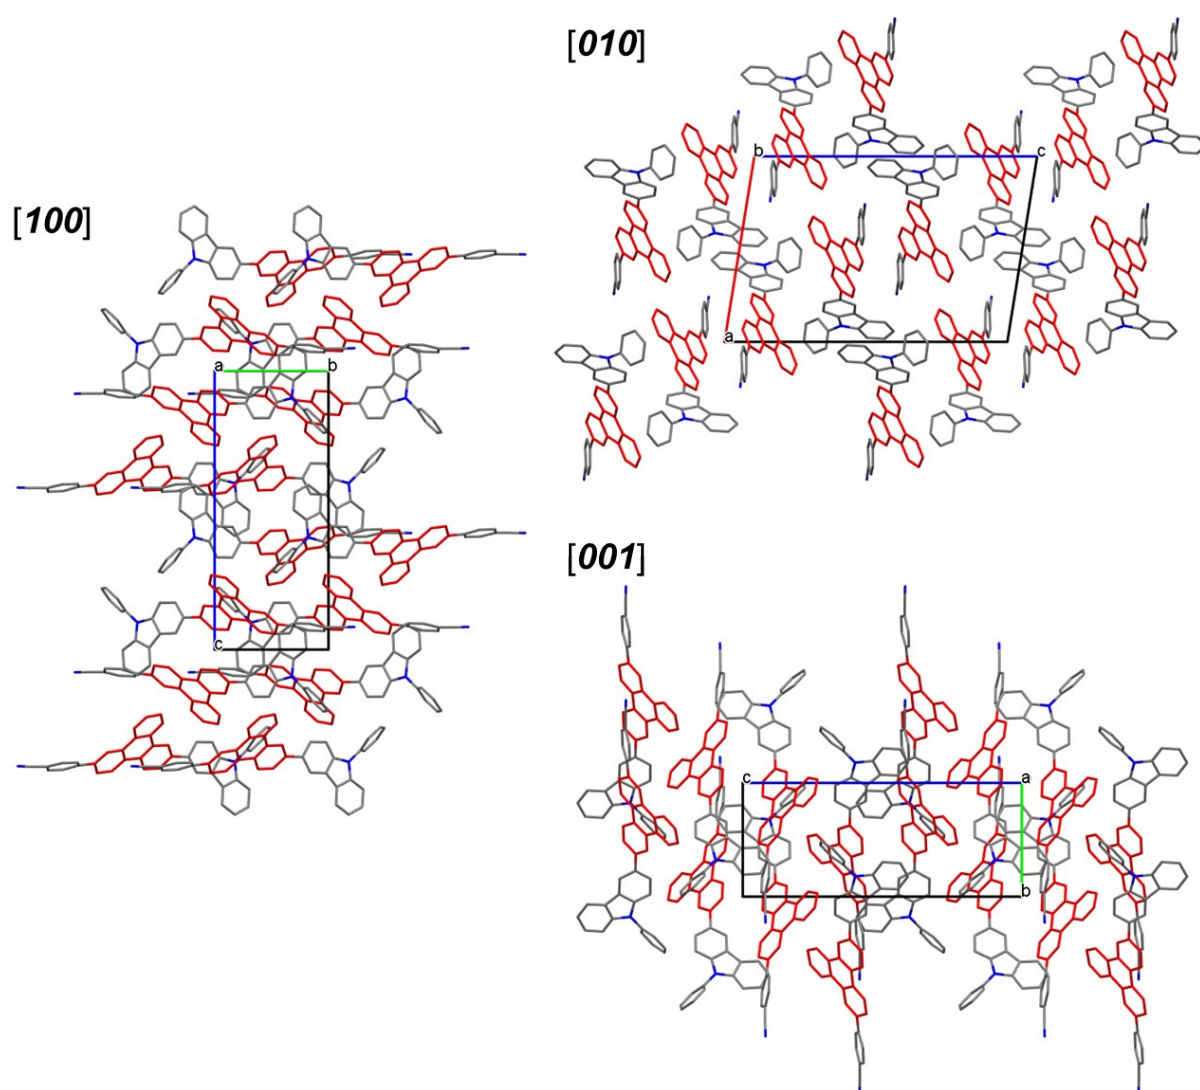

**Fig. S4** Crystal packing of CTCN along  $[100]$ ,  $[010]$ , and  $[001]$  directions with red-highlighted triphenylene structure. All hydrogen atoms were omitted for clarity.



### 3. DFT calculation results

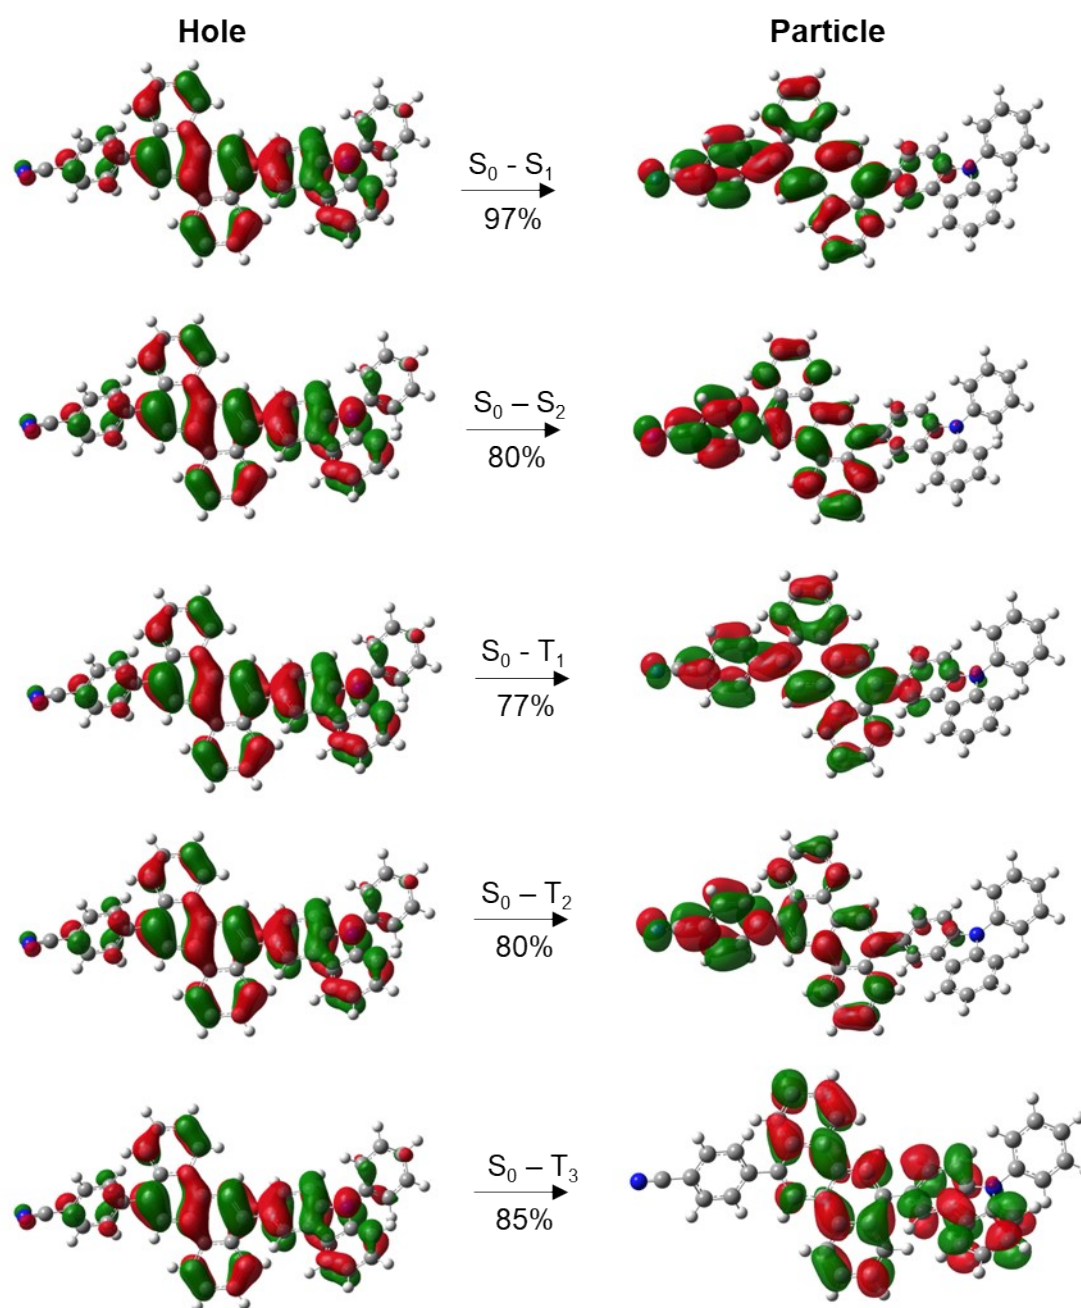

| State | Energy (eV) | Osc. Strength | Transition character | Sm index |
|-------|-------------|---------------|----------------------|----------|
| S1    | 2.69        | 0.5674        | LE+CT                | 0.44675  |
| S2    | 3.31        | 0.0248        | LE+CT                | 0.31347  |
| T1    | 1.48        | -             | LE+CT                | 0.61379  |
| T2    | 2.72        | -             | LE+CT                | 0.46677  |
| T3    | 2.88        | -             | LE+CT                | 0.36178  |

**Fig. S5** NTOs and the excited states energies of CCCN calculated by the TD-B3LYP/6-31G(d,p) function.

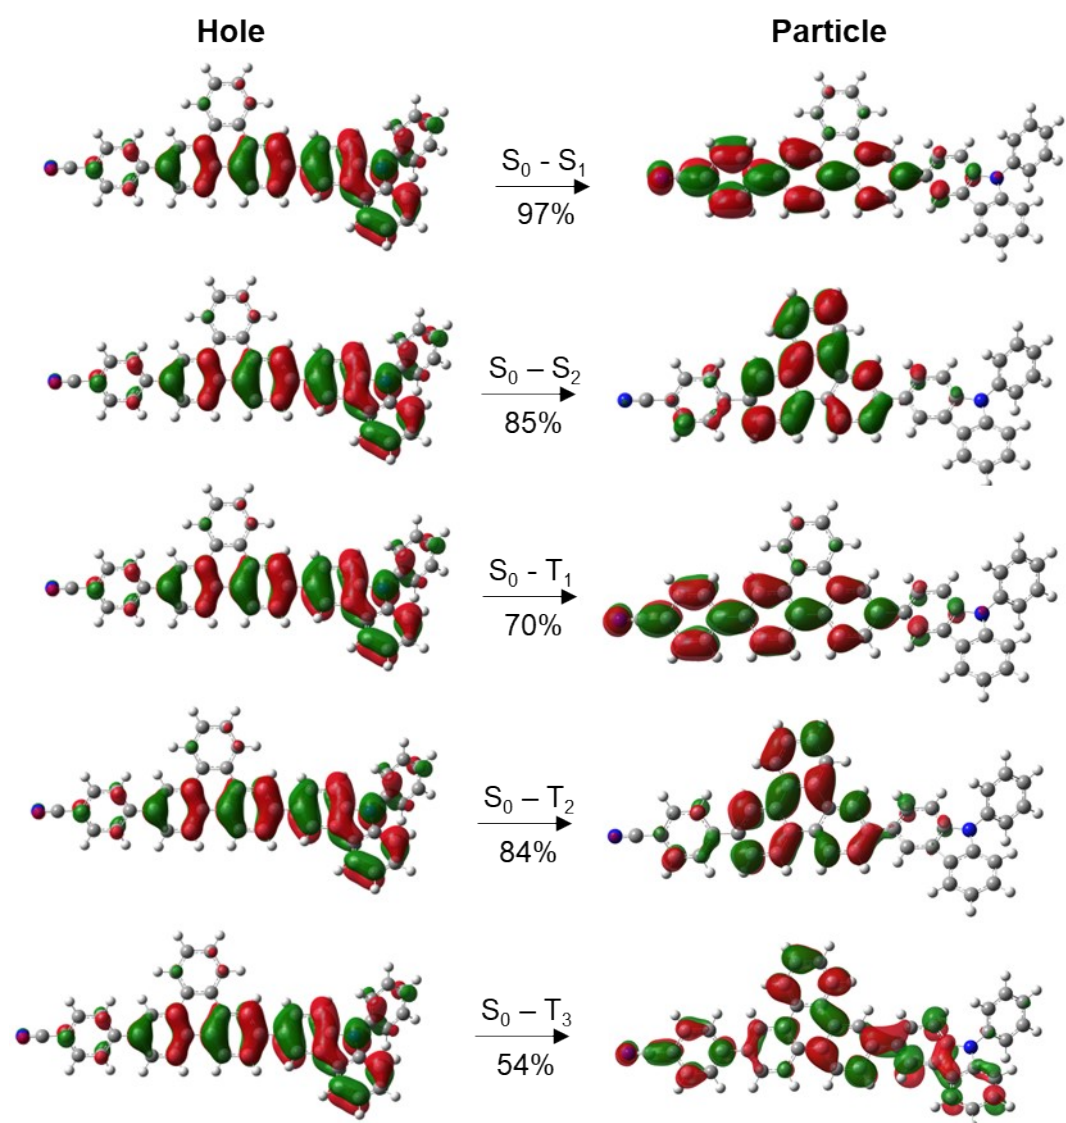

| State | Energy (eV) | Osc. Strength | Transition character | Sm index |
|-------|-------------|---------------|----------------------|----------|
| S1    | 2.85        | 0.7212        | LE+CT                | 0.25433  |
| S2    | 3.41        | 0.0586        | LE+CT                | 0.53270  |
| T1    | 1.92        | -             | LE+CT                | 0.46628  |
| T2    | 2.69        | -             | LE+CT                | 0.40238  |
| T3    | 3.03        | -             | LE+CT                | 0.43569  |

**Fig. S6** NTOs and the excited states energies of CTCN calculated by the TD-B3LYP/6-31G(d,p) function.

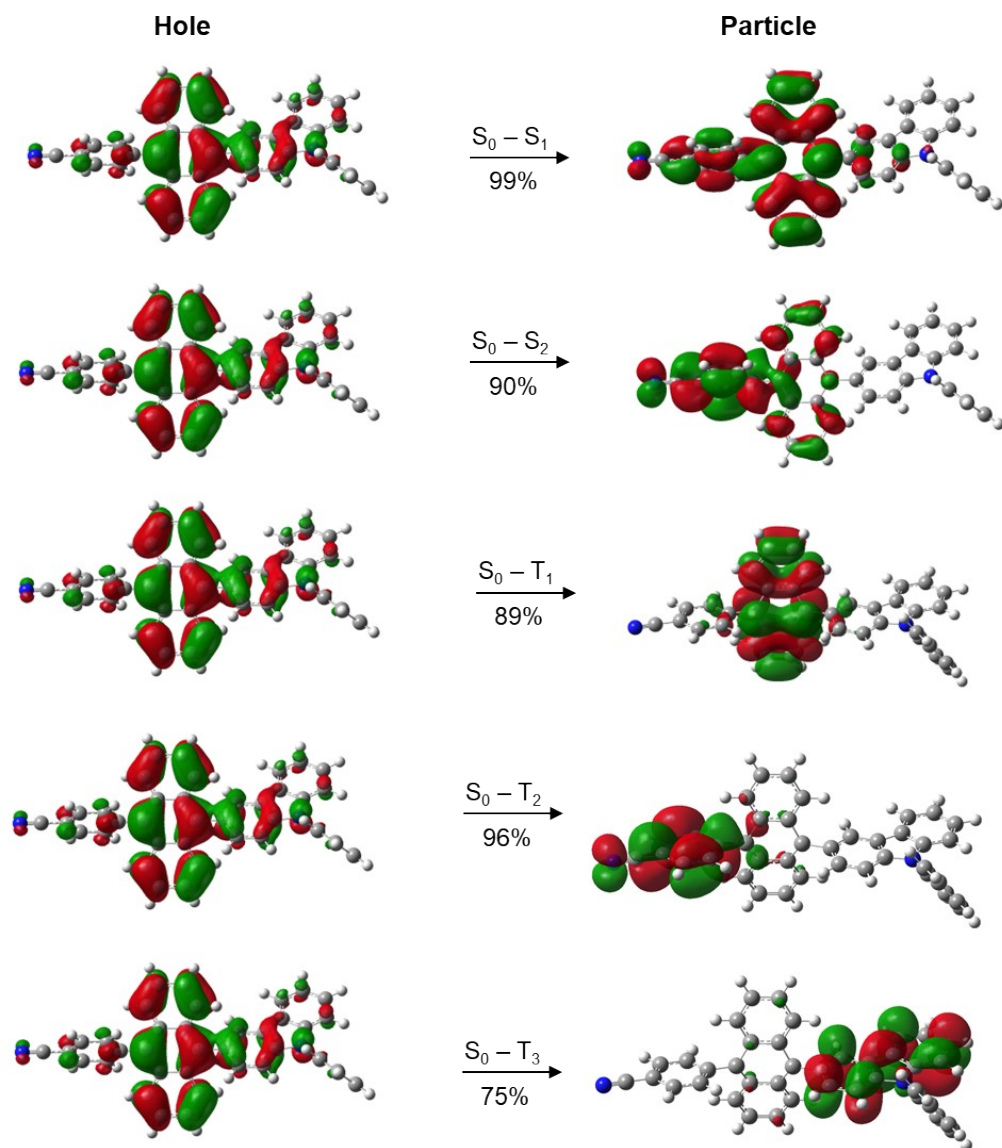

| State | Energy (eV) | Osc. Strength | Transition character | Sm index |
|-------|-------------|---------------|----------------------|----------|
| S1    | 3.05        | 0.4561        | LE+CT                | 0.60781  |
| S2    | 3.14        | 0.0019        | LE+CT                | 0.21827  |
| T1    | 1.73        | -             | LE+CT                | 0.71428  |
| T2    | 2.97        | -             | LE+CT                | 0.27335  |
| T3    | 3.23        | -             | LE+CT                | 0.42218  |

**Fig. S7** NTOs and the excited states energies of CACN calculated by the TD-B3LYP/6-31G(d,p) function.



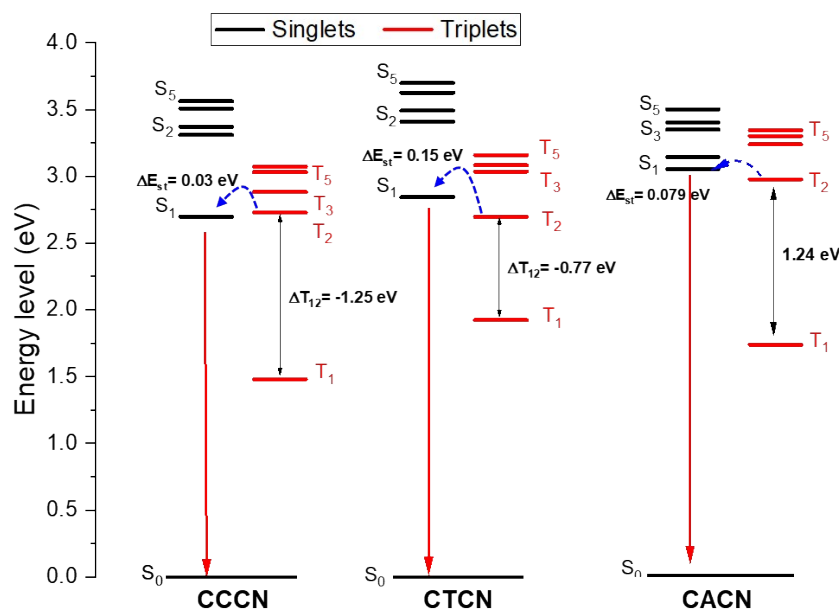

**Fig. S8** The energy diagrams of single excited states and triplet excited states calculated by TD-DFT B3LYP/6-31G(d,p).

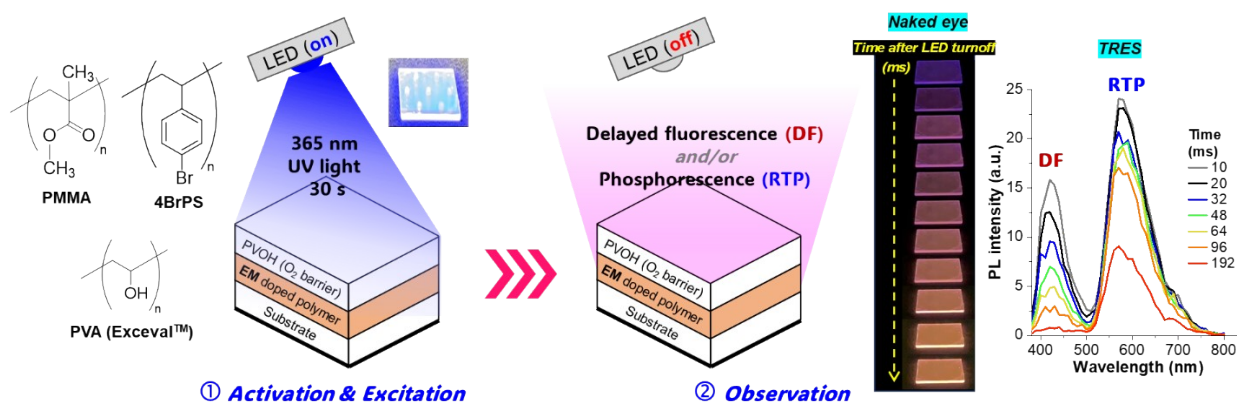

**Fig. S9** Experimental scheme for the observation of delayed fluorescence (DF)/room-temperature phosphorescence (RTP) emissions in solid films at ambient conditions.

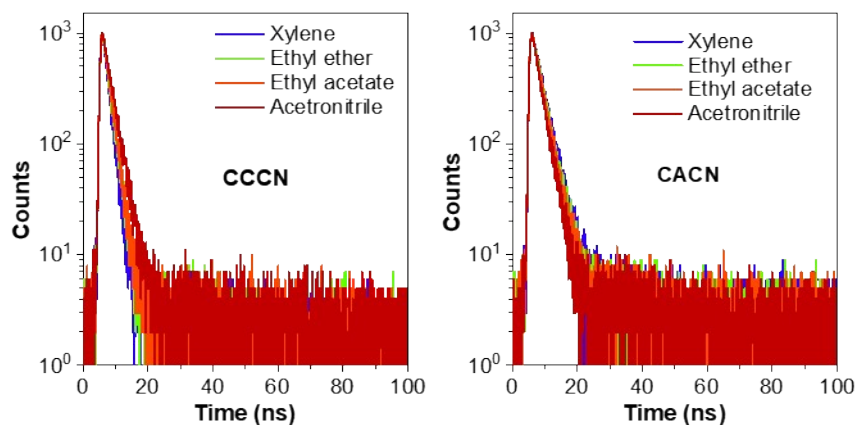

**Fig. S10** Transient PL decay spectra of CCCN and CACN in various solvents.

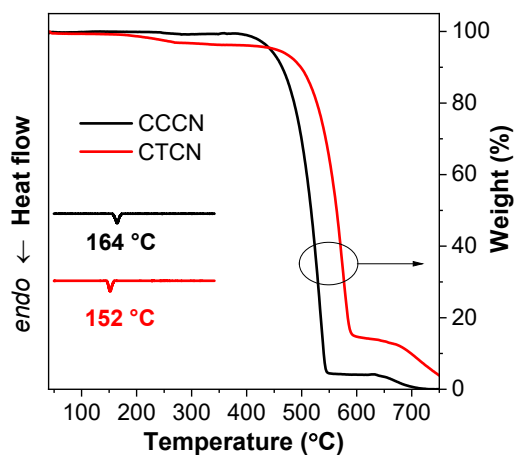

**Fig. S11** DSC and TGA thermograms of CCCN and CTCN measured at a heating rate of 10 °C/min under N<sub>2</sub> flow.

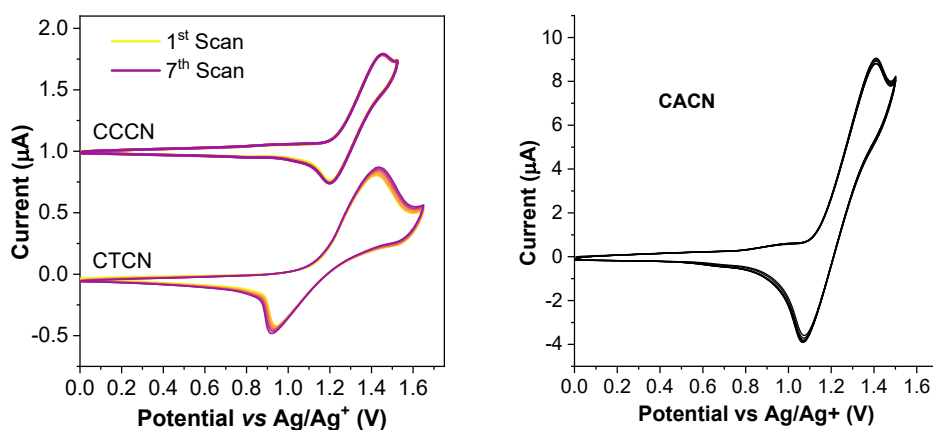

**Fig. S12** CV voltammograms analyzed in dry DCM containing *n*-Bu<sub>4</sub>NPF<sub>6</sub> as a supporting electrolyte at a scan rate of 50 mV s<sup>-1</sup> under Ar atmosphere.

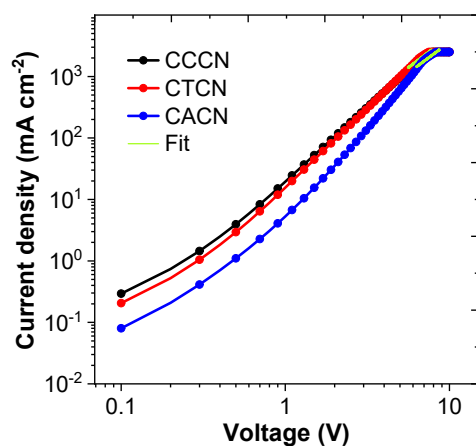

**Fig. S13** *I-V* plots of the hole-only device (HOD).

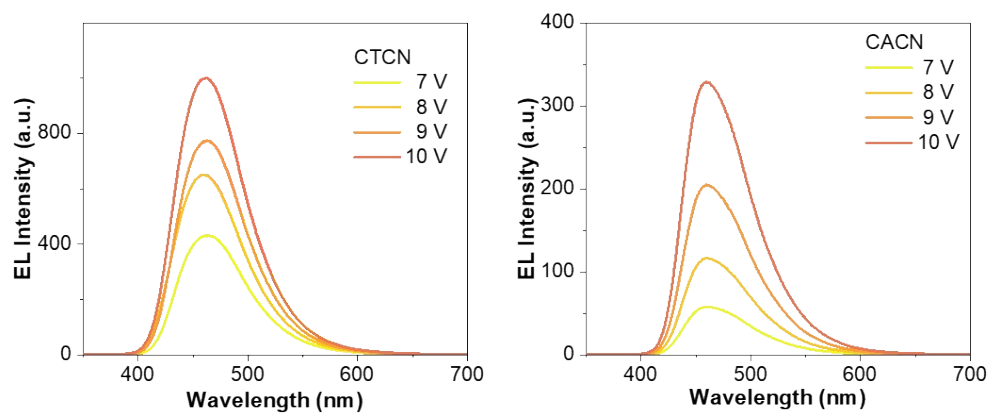

**Fig. S14** EL spectra at different voltages of CTCN- and CACN-based OLEDs.

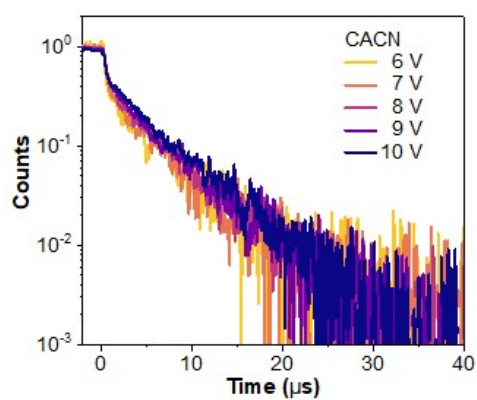

**Fig. S15** Transient EL spectra at different voltage of CACN-based device.

**Fig. S16** Copies of 600 MHz NMR ( $^1\text{H}/^{13}\text{C}$ ) spectra in  $\text{CDCl}_3$  and HRMS mass spectra of the synthesized compounds.

**Compound 2**

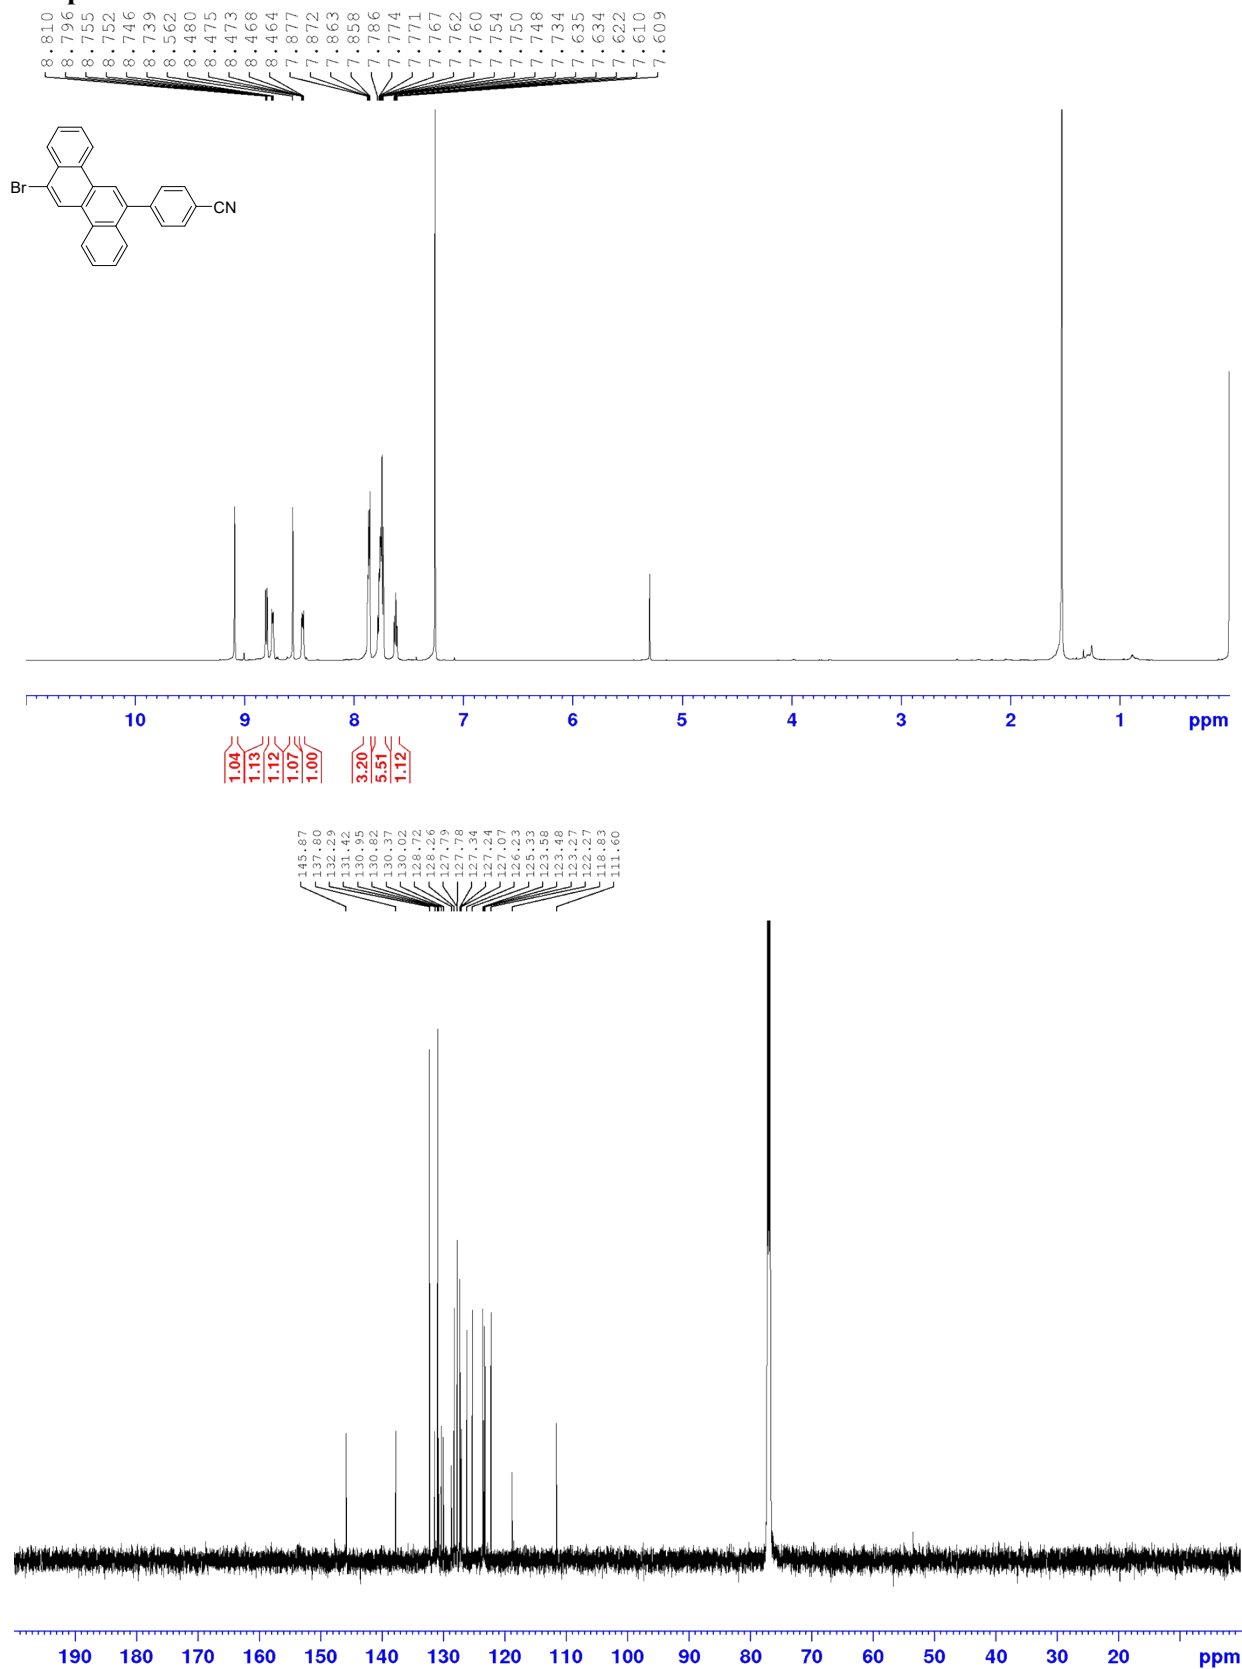

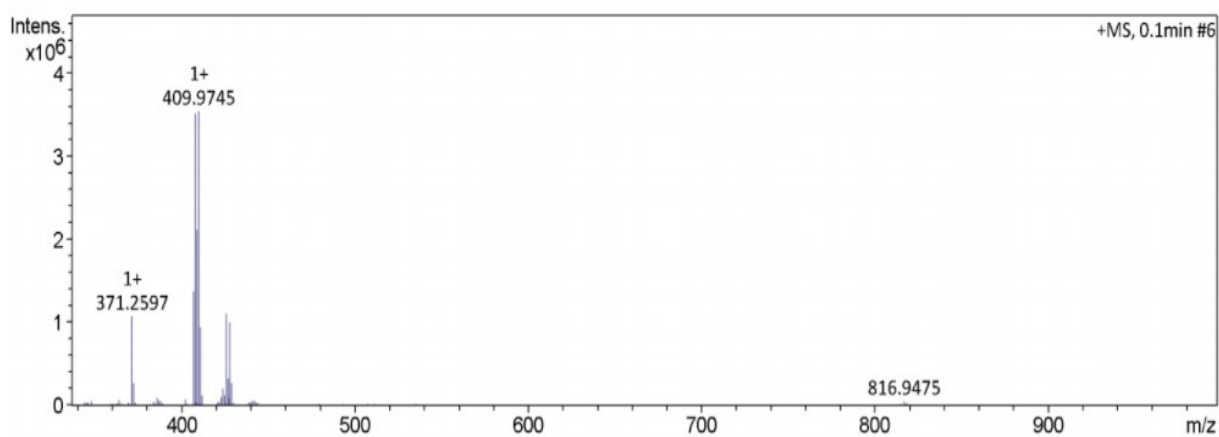

CCCN

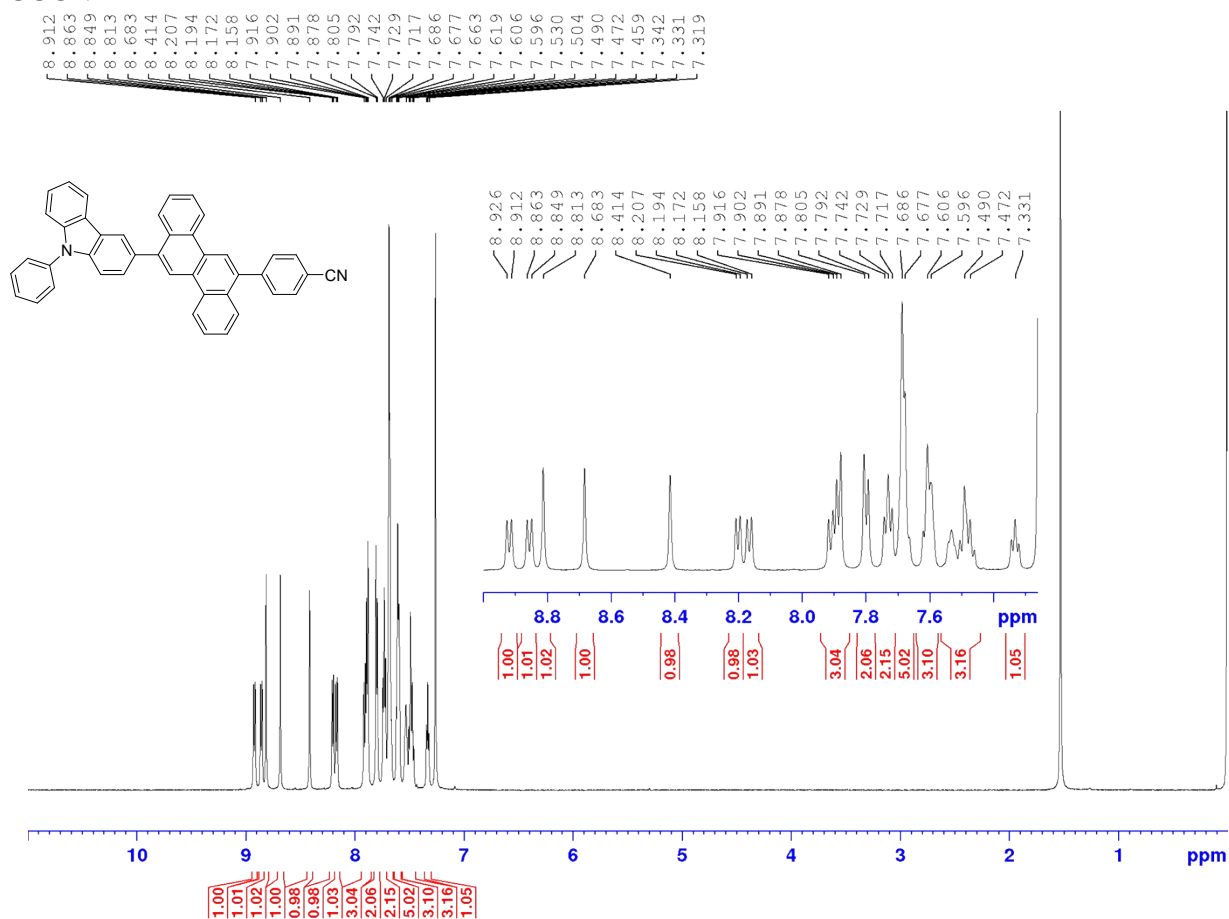



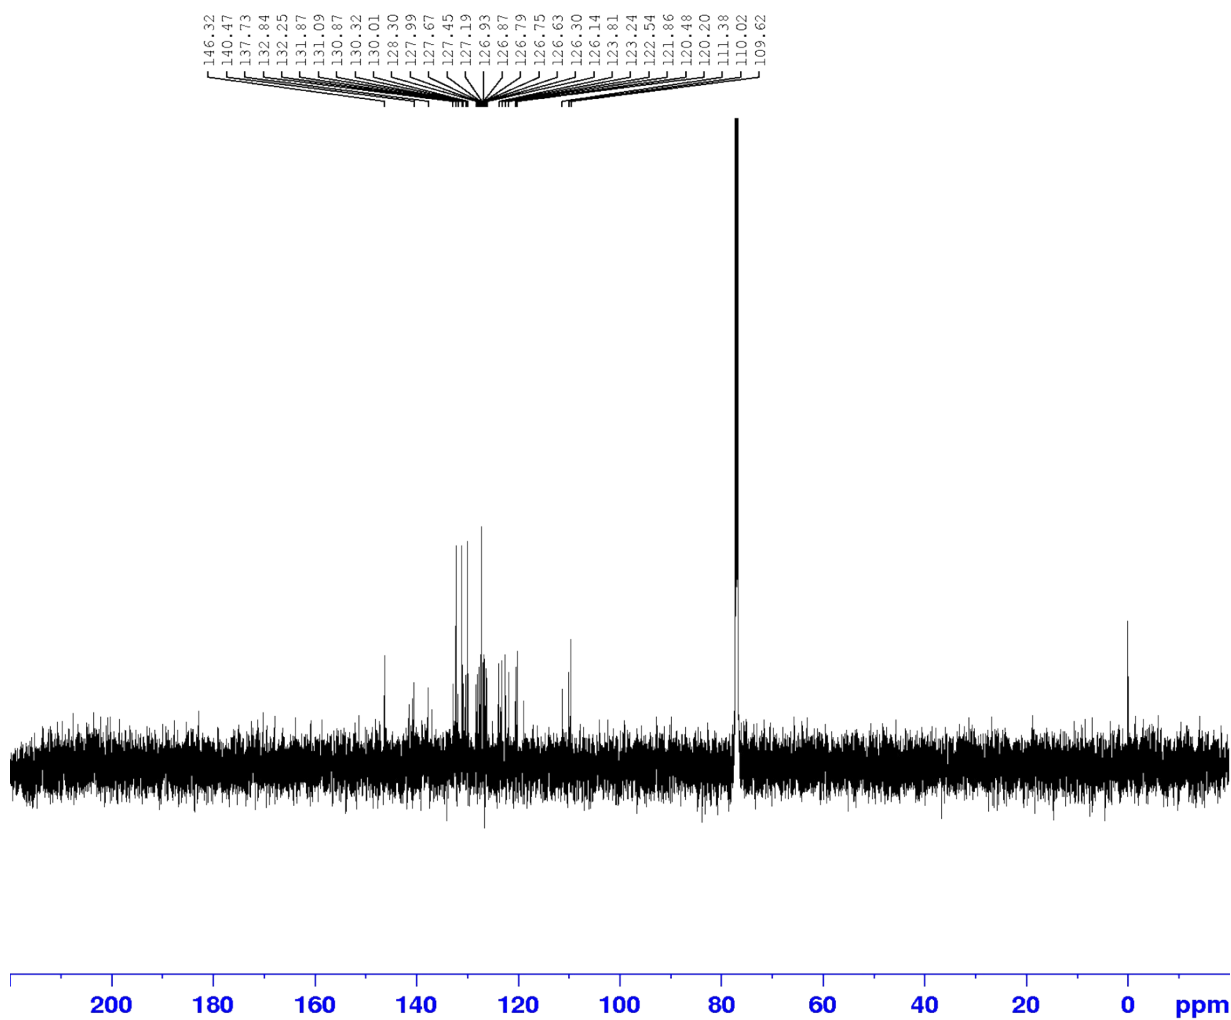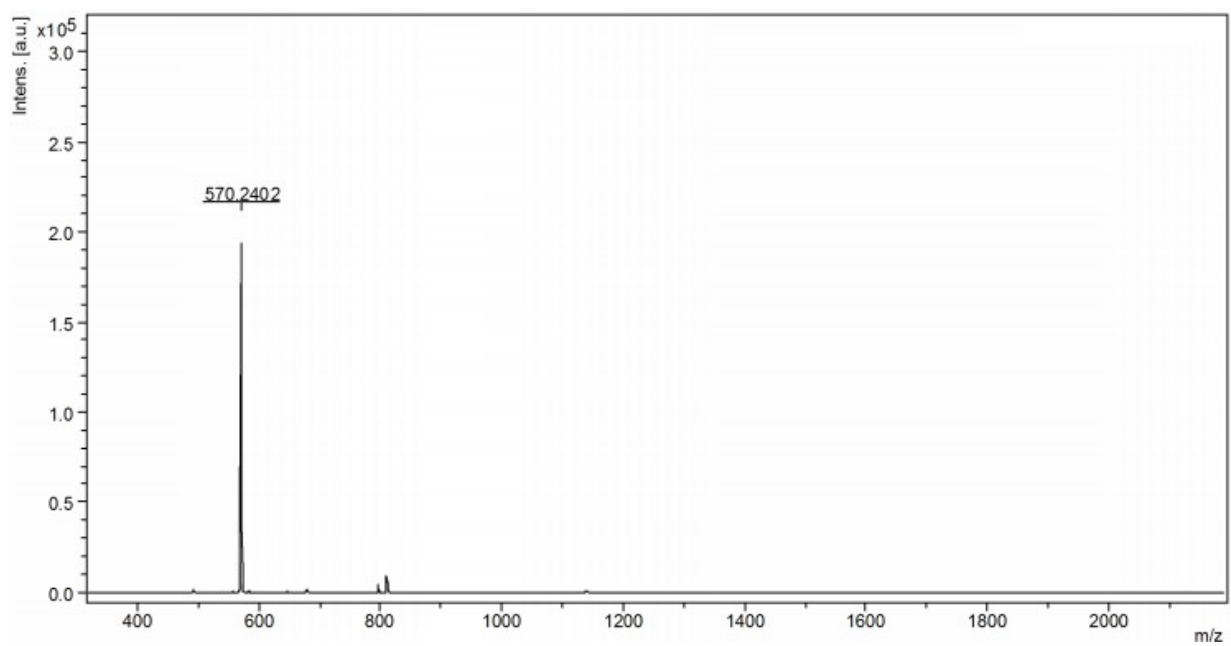

# Compound 4

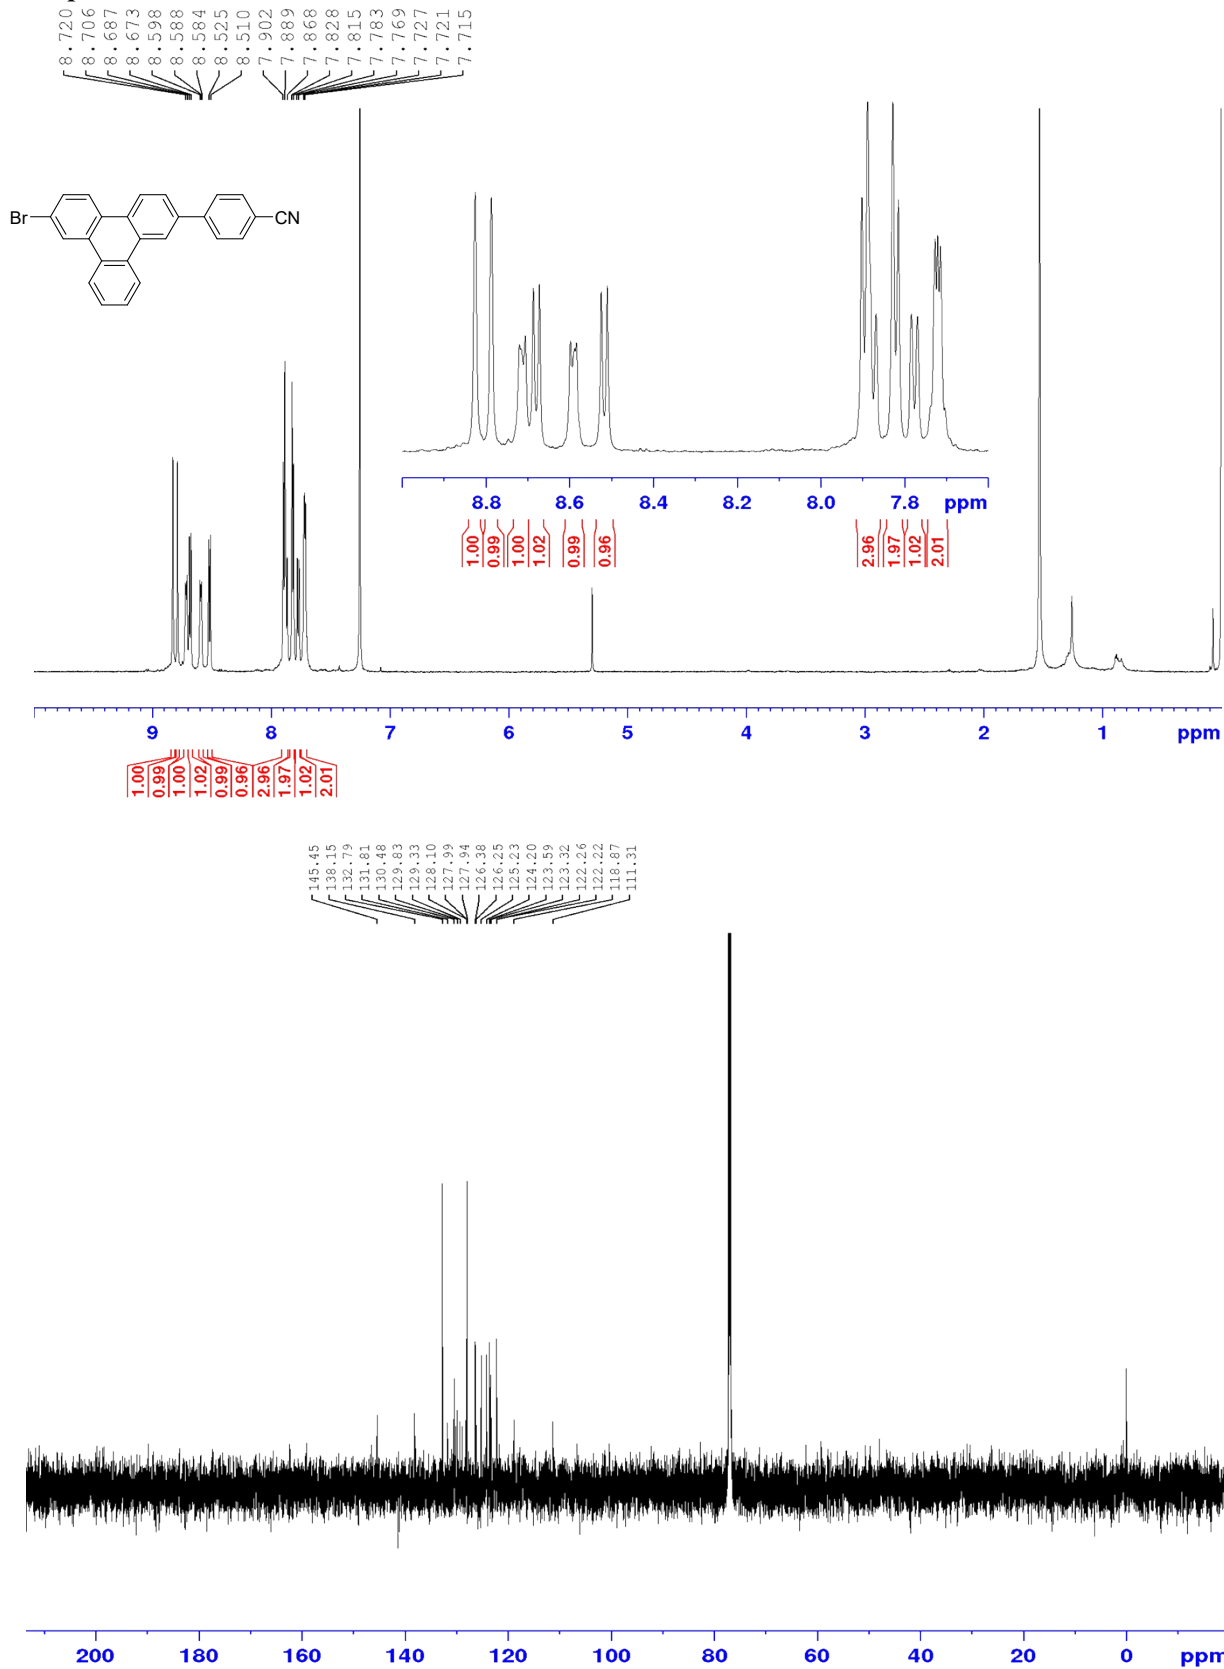

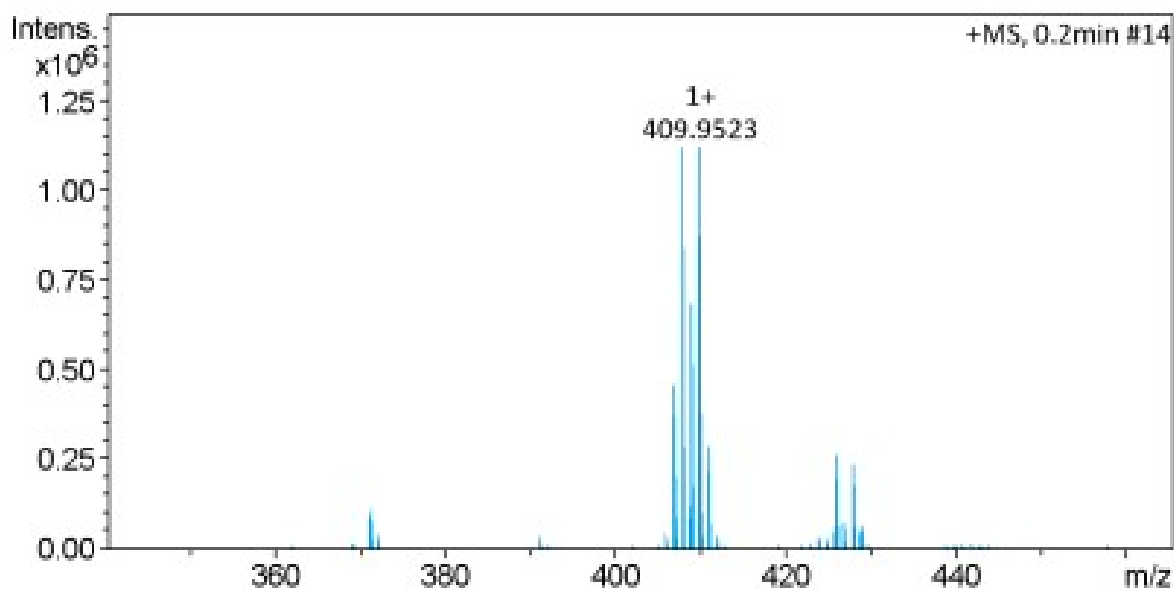

CTCN

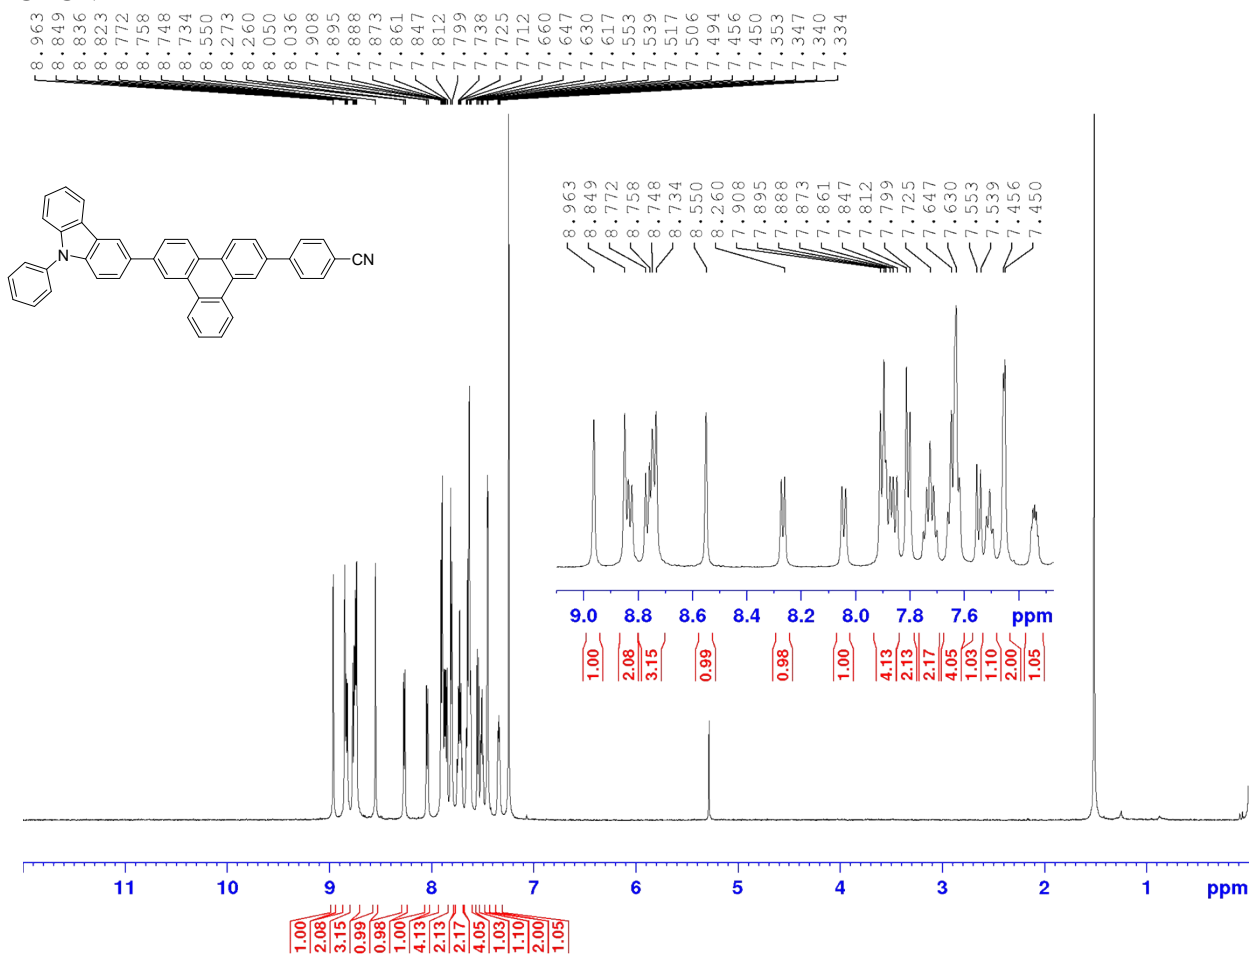

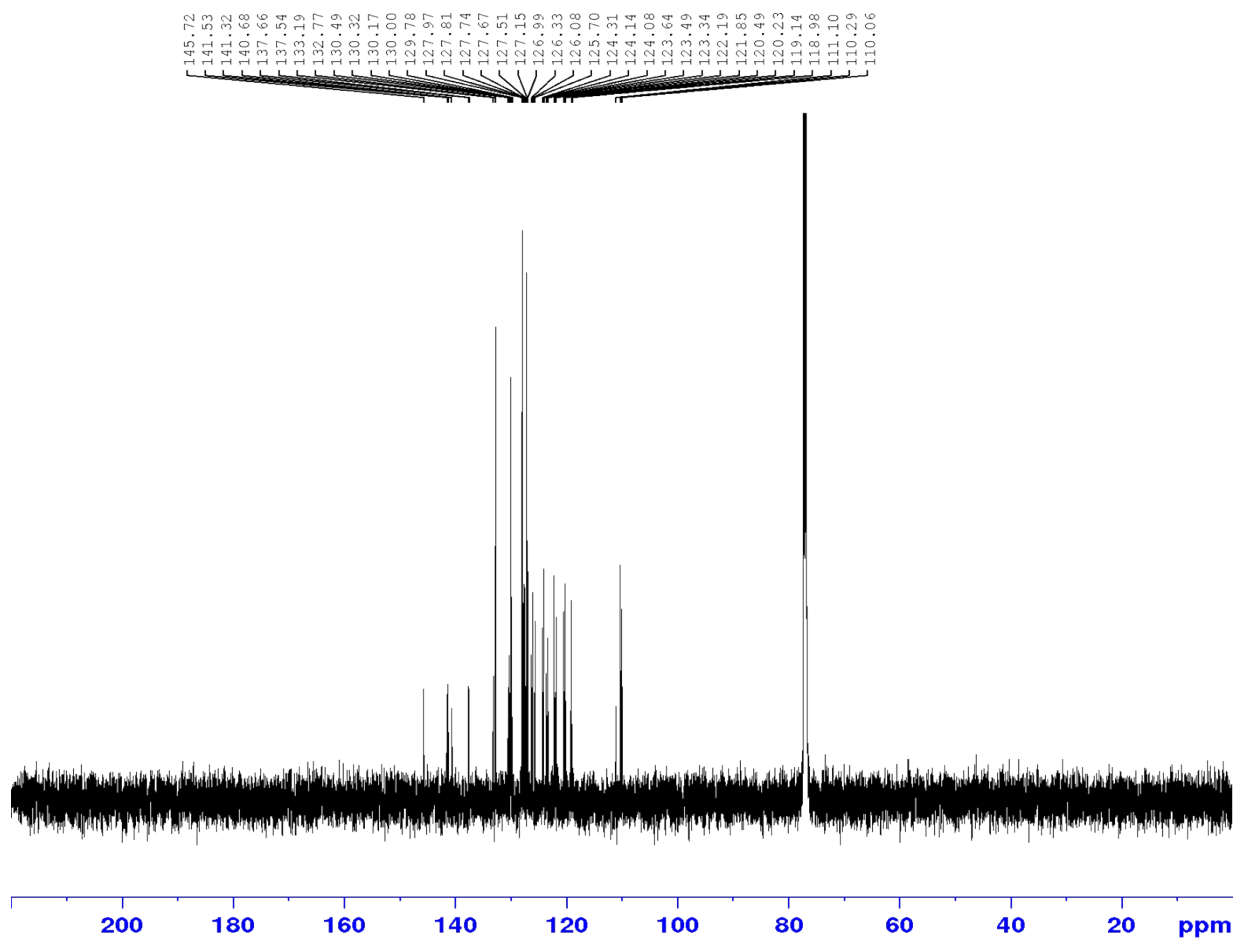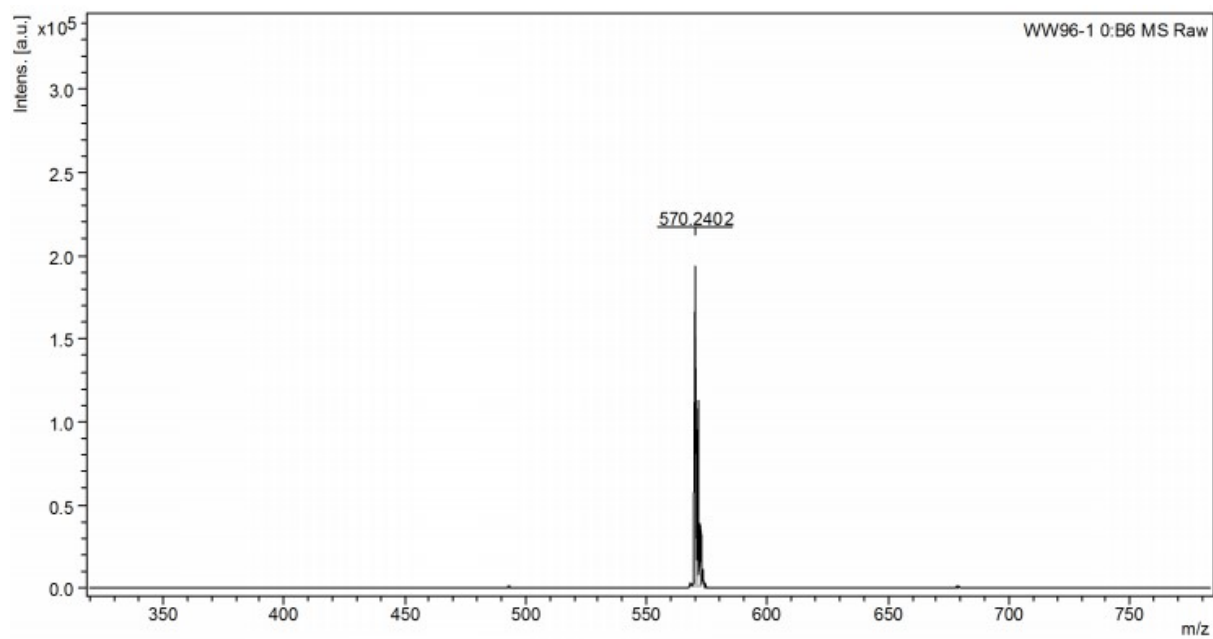

# Compound 6

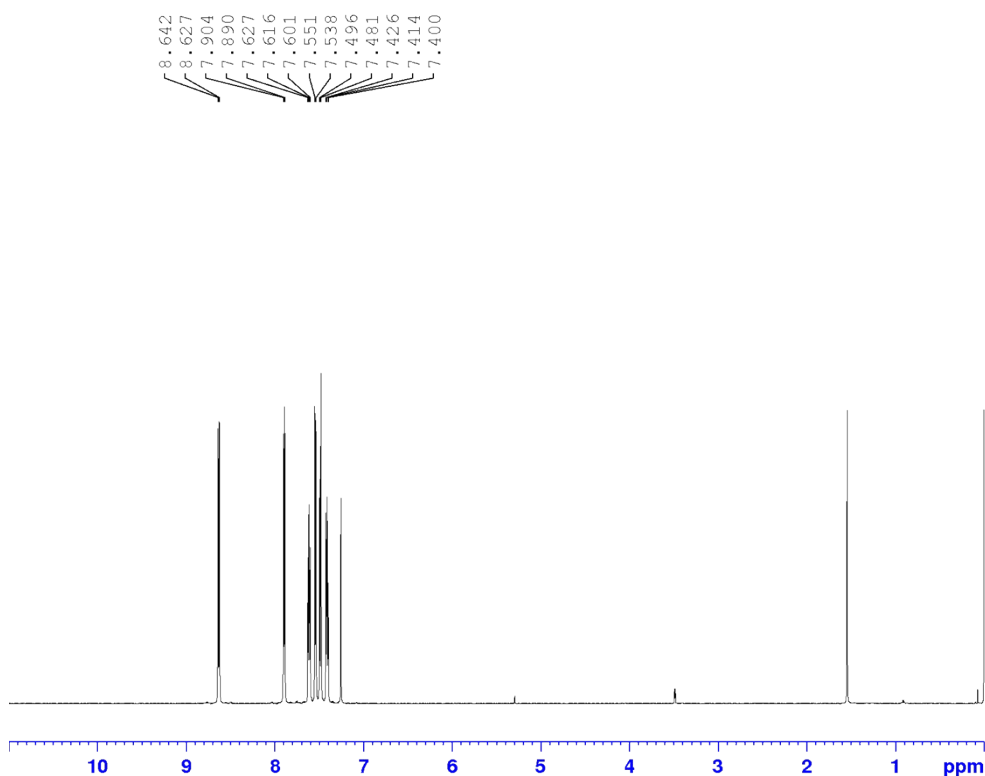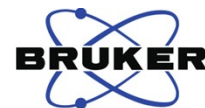

Current Data Parameters  
NAME WW188-1F3C1  
EXPNO 1  
PROCNO 1

F2 - Acquisition Parameters  
Date\_ 20200909  
Time 14.46 h  
INSTRUM spect  
PROBHD Z856701\_0011 (  
PULPROG zg30  
TD 64902  
SOLVENT CDCl3  
NS 8  
DS 2  
SWH 12019.230 Hz  
FIDRES 0.370381 Hz  
AQ 2.6999233 sec  
RG 191.96  
DW 41.600 usec  
DE 6.50 usec  
TE 0 K  
D1 2.00000000 sec  
TDO 1  
SFO1 600.1336008 MHz  
NUC1 1H  
P0 4.33 usec  
P1 13.00 usec  
PLW1 23.00000000 W

F2 - Processing parameters  
SI 65536  
SF 600.1300170 MHz  
WDW EM  
SSB 0  
LB 1.00 Hz  
GB 0  
PC 1.00

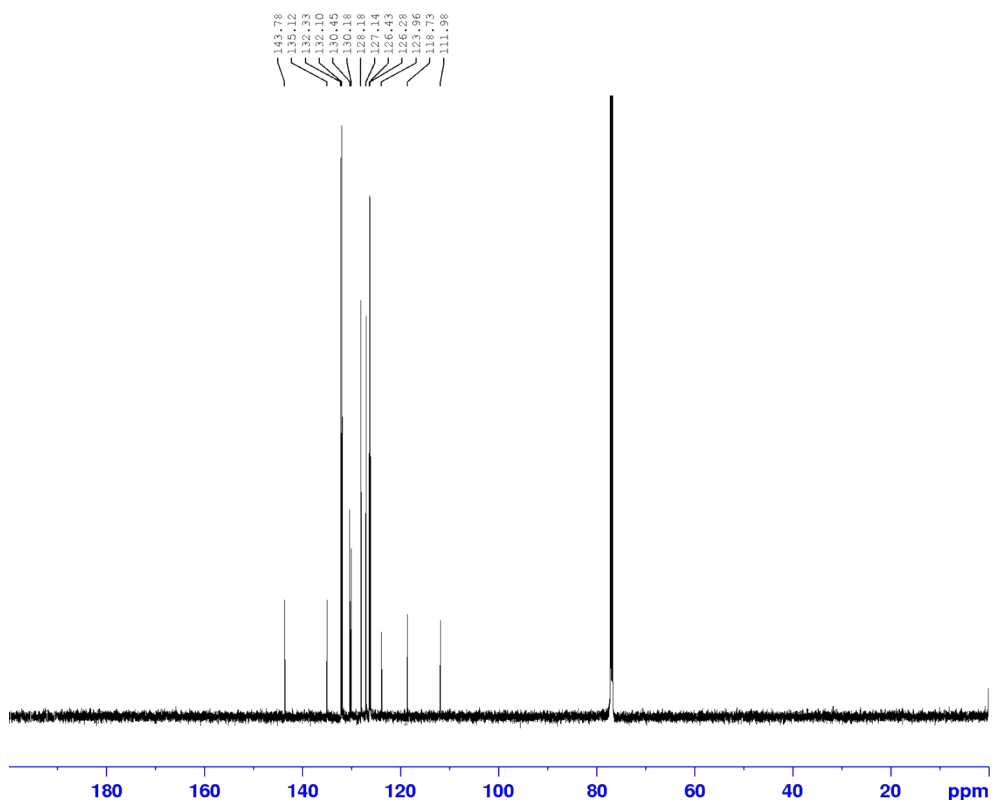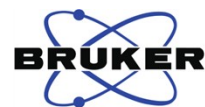

Current Data Parameters  
NAME WW188-1F3C1  
EXPNO 2  
PROCNO 1

F2 - Acquisition Parameters  
Date\_ 20200909  
Time 22.47 h  
INSTRUM spect  
PROBHD Z856701\_0011 (  
PULPROG zgpg30  
TD 65536  
SOLVENT CDCl3  
NS 1024  
DS 2  
SWH 36231.883 Hz  
FIDRES 1.105709 Hz  
AQ 0.9043968 sec  
RG 191.96  
DW 13.800 usec  
DE 6.50 usec  
TE 0 K  
D1 2.00000000 sec  
D11 0.03000000 sec  
TDO 1  
SFO1 150.9178988 MHz  
NUC1 13C  
P0 3.33 usec  
P1 10.00 usec  
PLW1 54.00000000 W  
SFO2 600.1324005 MHz  
NUC2 1H  
CPDPRG2 waltz16  
PCPD2 70.00 usec  
PLW2 23.00000000 W  
PLW12 0.79326999 W  
PLW13 0.39901000 W

F2 - Processing parameters  
SI 32768  
SF 150.9028094 MHz  
WDW EM  
SSB 0  
LB 1.00 Hz  
GB 0  
PC 1.40



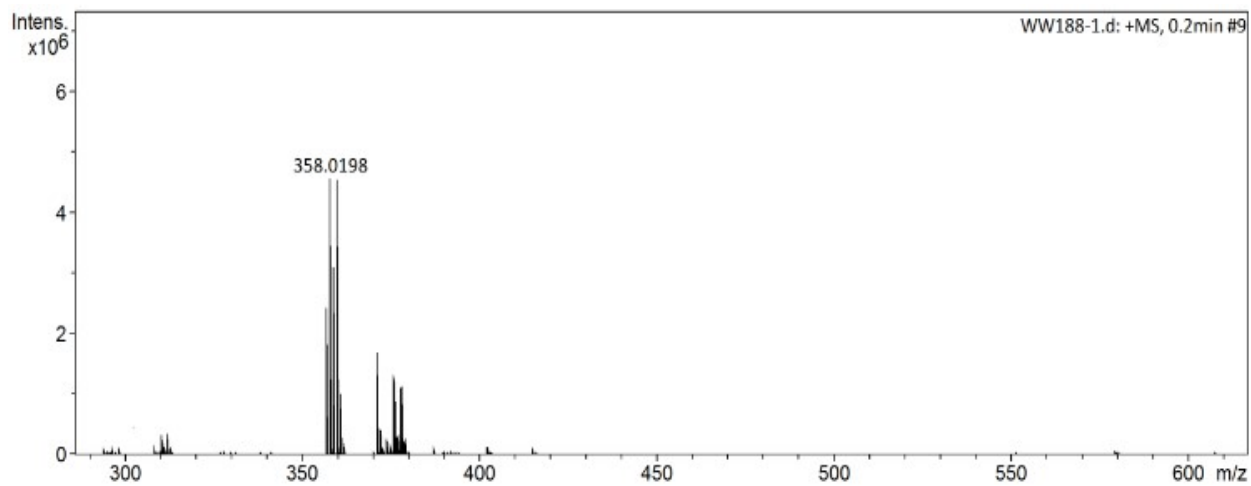

CACN

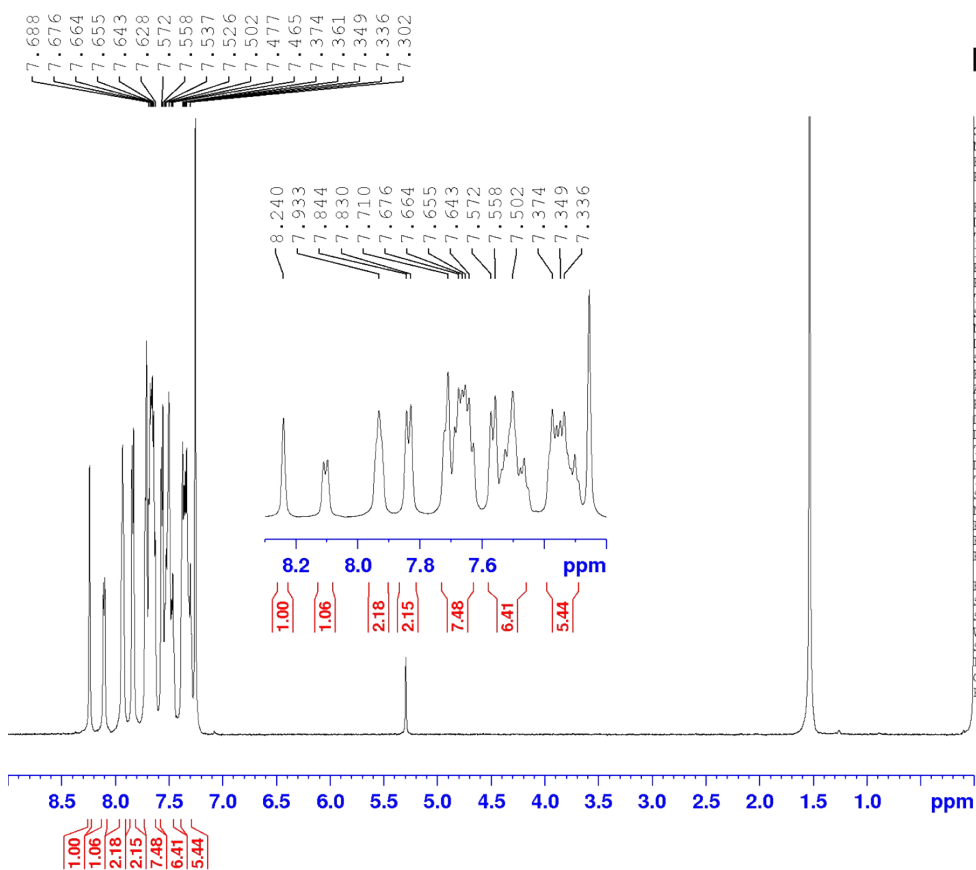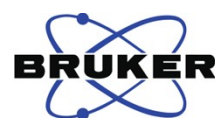

Current Data Parameters  
NAME WW370-1F1C1  
EXPNO 1  
PROCNO 1

F2 - Acquisition Parameters  
Date\_ 20220111  
Time 9.57 h  
INSTRUM spect  
PROBHD Z114607\_0208 (   
PULPROG zg30  
TD 64902  
SOLVENT CDCl3  
NS 8  
DS 2  
SWH 12019.230 Hz  
FIDRES 0.370381 Hz  
AQ 2.6999233 sec  
RG 130.93  
DW 41.600 usec  
DE 6.50 usec  
TE 303.1 K  
D1 2.00000000 sec  
TD0 1  
SFO1 600.1336008 MHz  
NUC1 1H  
P0 3.40 usec  
P1 10.20 usec  
PLW1 23.33499908 W

F2 - Processing parameters  
SI 65536  
SF 600.1300179 MHz  
WDW EM  
SSB 0  
LB 1.00 Hz  
GB 0  
PC 1.00

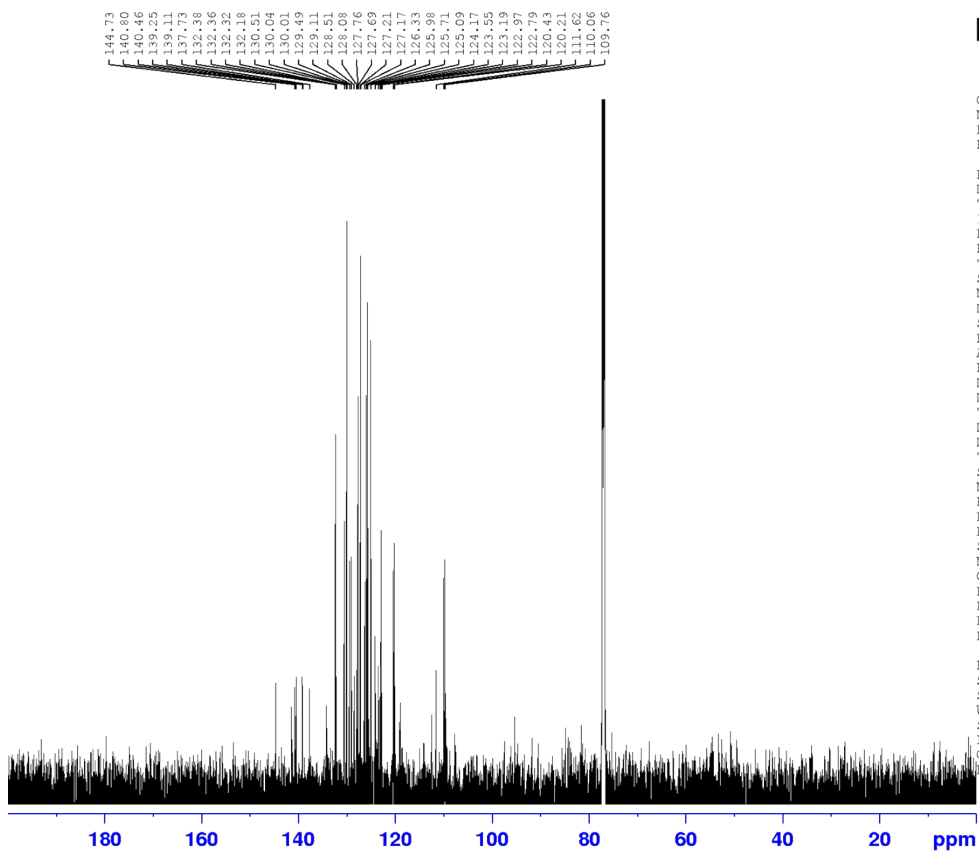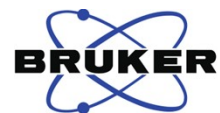

Current Data Parameters  
 NAME: WW370-1F1C1  
 EXPNO: 2  
 PROCNO: 1

F2 - Acquisition Parameters  
 Date\_: 20220114  
 Time: 7.49 h  
 INSTRUM: spect  
 PROBHD: Z114607\_0208 (1  
 PULPROG: zgpg30  
 TD: 65536  
 SOLVENT: CDC13  
 NS: 1024  
 DS: 2  
 SWH: 36231.883 Hz  
 FIDRES: 1.105709 Hz  
 AQ: 0.9043968 sec  
 RG: 191.96  
 DW: 13.800 usec  
 DE: 6.50 usec  
 TE: 303.1 K  
 D1: 2.00000000 sec  
 D11: 0.03000000 sec  
 TD0: 1  
 SFO1: 150.9178988 MHz  
 NUC1: 13C  
 P0: 3.67 usec  
 P1: 11.00 usec  
 PLW1: 91.30000305 W  
 SFO2: 600.1324005 MHz  
 NUC2: 1H  
 CPDPRG2: waltz16  
 PCPD2: 70.00 usec  
 PLW2: 23.33499908 W  
 PLW12: 0.49546000 W  
 PLW13: 0.24921000 W

F2 - Processing parameters  
 SI: 32768  
 SF: 150.9028085 MHz  
 WDW: EM  
 SSB: 0  
 LB: 1.00 Hz  
 GB: 0  
 PC: 1.40

Comment 1

Comment 2

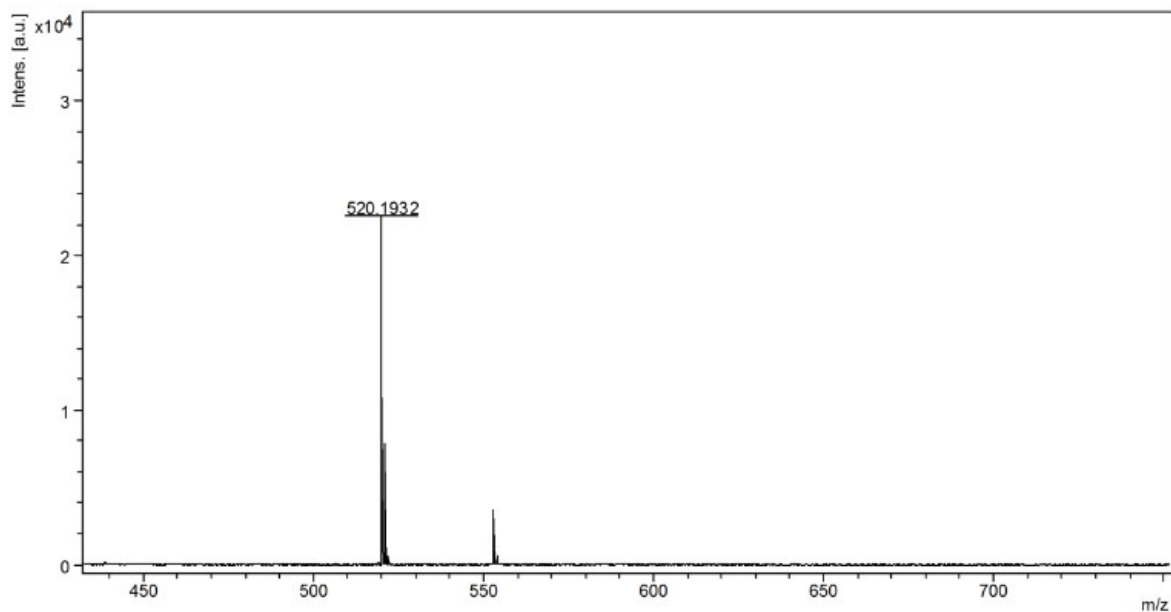

Supplement: d5tc03720d1.pdf [file d5tc03720d1.pdf]
